# Supplementary material for: Transcriptional Profiling of SARS-CoV-2-Infected Calu-3 Cells Reveals Immune-Related Signaling Pathways
Source: MDPI journal article supplement (doi:10.3390/pathogens12111373), 2023-11-20
Supplement: s1 [file s1]

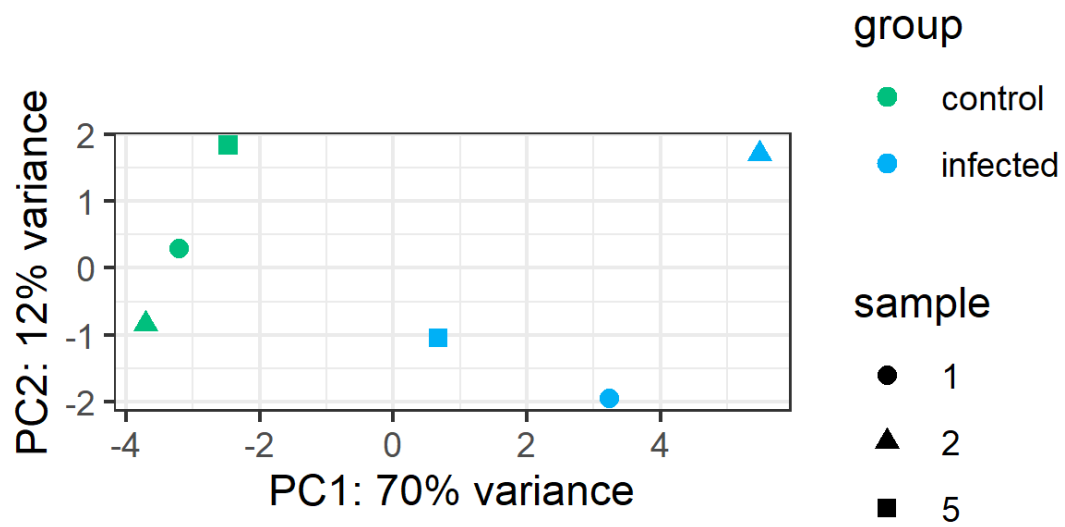

**Supplementary file S2** - Principal Component Analysis (PCA). PC1: Principal Component; PC2: Principal Component 2. Green: control samples (C1, C2, and C5). Blue: infected samples (I1, I2, and I5).
